# Supplementary material
Source: PubMed Central journal article supplement (PMC6241000)
Supplement: 10680_2017_9430_MOESM3_ESM.pdf [file 10680_2017_9430_MOESM3_ESM.pdf]

### Supplementary material 3

Odds ratios (OR) of the likelihood of a third birth among Finnish fathers of at least two children,  $n=23,152$

| Model                           | 0     |         | 1     |         | 2     |         | 3     |         | 4     |         | 5     |         |
|---------------------------------|-------|---------|-------|---------|-------|---------|-------|---------|-------|---------|-------|---------|
|                                 | OR    | (SE)    | OR    | (SE)    | OR    | (SE)    | OR    | (SE)    | OR    | (SE)    | OR    | (SE)    |
| Level of education              |       |         |       |         |       |         |       |         |       |         |       |         |
| Basic (ref.)                    | 1     |         | 1     |         | 1     |         | 1     |         | 1     |         | 1     |         |
| Lower secondary                 | 0.88* | (0.034) | 0.89* | (0.034) | 0.89* | (0.034) | 0.92* | (0.034) | 0.93* | (0.034) | 0.93* | (0.035) |
| Upper secondary                 | 0.80* | (0.041) | 0.82* | (0.042) | 0.83* | (0.043) | 0.91* | (0.049) | 0.92  | (0.049) | 0.92  | (0.050) |
| Tertiary                        | 1.03  | (0.040) | 1.07  | (0.040) | 1.07  | (0.044) | 1.14* | (0.058) | 1.17* | (0.059) | 1.20* | (0.060) |
| Living area in childhood        |       |         |       |         |       |         |       |         |       |         |       |         |
| Helsinki region                 | 1.00  | (0.051) | 1.02  | (0.051) | 1.05  | (0.055) | 1.05  | (0.055) | 1.06  | (0.055) | 1.01  | (0.056) |
| Rest of Uusimaa                 | 0.84  | (0.062) | 0.84* | (0.063) | 0.84* | (0.063) | 0.84* | (0.063) | 0.85* | (0.063) | 0.84* | (0.064) |
| Western Finland (ref.)          | 1     |         | 1     |         | 1     |         | 1     |         | 1     |         | 1     |         |
| Eastern Finland                 | 1.09  | (0.030) | 1.06* | (0.030) | 1.06  | (0.032) | 1.06  | (0.032) | 1.06  | (0.032) | 1.06  | (0.032) |
| Northern Finland                | 1.18  | (0.067) | 1.15* | (0.068) | 1.14  | (0.069) | 1.14  | (0.069) | 1.13  | (0.069) | 1.14* | (0.070) |
| Family type in childhood        |       |         |       |         |       |         |       |         |       |         |       |         |
| Two parents and children (ref.) | 1     |         | 1     |         | 1     |         | 1     |         | 1     |         | 1     |         |
| Mother and children             | 0.92  | (0.056) | 0.98  | (0.057) | 0.96  | (0.058) | 0.98  | (0.058) | 0.98  | (0.058) | 0.97  | (0.058) |
| Father and children             | 0.81  | (0.167) | 0.85  | (0.167) | 0.83  | (0.168) | 0.83  | (0.169) | 0.82  | (0.168) | 0.77  | (0.172) |
| Sibship size                    |       |         |       |         |       |         |       |         |       |         |       |         |
| 0 (ref.)                        | 1     |         | 1     |         | 1     |         | 1     |         | 1     |         | 1     |         |
| 1-2                             | 1.14* | (0.041) | 1.13* | (0.041) | 1.13* | (0.042) | 1.13* | (0.043) | 1.14* | (0.043) | 1.14* | (0.043) |
| 3-                              | 1.33* | (0.044) | 1.30* | (0.045) | 1.24* | (0.049) | 1.25* | (0.049) | 1.26* | (0.049) | 1.27* | (0.049) |
| Parental level of education     |       |         |       |         |       |         |       |         |       |         |       |         |
| Less than primary (ref.)        | 1     |         |       |         | 1     |         | 1     |         | 1     |         | 1     |         |
| Primary school                  | 0.87* | (0.043) |       |         | 0.93  | (0.045) | 0.93  | (0.045) | 0.94  | (0.045) | 0.94  | (0.045) |
| More than primary               | 0.98  | (0.054) |       |         | 1.15* | (0.068) | 1.14  | (0.068) | 1.15  | (0.068) | 1.13  | (0.069) |
| Parental occupational position  |       |         |       |         |       |         |       |         |       |         |       |         |
| Worker (ref.)                   | 1     |         |       |         | 1     |         | 1     |         | 1     |         | 1     |         |
| Professional/administrative     | 1.00  | (0.039) |       |         | 0.94  | (0.048) | 0.93  | (0.048) | 0.93  | (0.048) | 0.92  | (0.049) |
| Farmer, <10 hect.               | 1.15* | (0.035) |       |         | 1.10* | (0.040) | 1.06  | (0.040) | 1.05  | (0.040) | 1.08  | (0.041) |
| Farmer, ≥10 hect.               | 1.23* | (0.051) |       |         | 1.23* | (0.055) | 1.11  | (0.056) | 1.11  | (0.057) | 1.16* | (0.057) |
| Self-employed/other/unknown     | 1.11* | (0.048) |       |         | 1.11* | (0.051) | 1.08  | (0.051) | 1.08  | (0.051) | 1.08  | (0.052) |
| Parental home ownership         |       |         |       |         |       |         |       |         |       |         |       |         |
| Owner (ref.)                    | 1     |         |       |         | 1     |         | 1     |         | 1     |         | 1     |         |
| Renter                          | 0.90* | (0.029) |       |         | 0.99  | (0.036) | 1.00  | (0.036) | 1.00  | (0.036) | 0.99  | (0.036) |
| Other/unknown                   | 0.96  | (0.061) |       |         | 0.98  | (0.061) | 0.99  | (0.062) | 0.99  | (0.062) | 0.98  | (0.063) |
| Crowding in childhood           |       |         |       |         |       |         |       |         |       |         |       |         |
| < 2 (ref.)                      | 1     |         |       |         | 1     |         | 1     |         | 1     |         | 1     |         |
| 2 < 3                           | 0.99  | (0.034) |       |         | 0.98  | (0.036) | 0.99  | (0.037) | 0.99  | (0.037) | 0.99  | (0.037) |
| ≥ 3                             | 1.12* | (0.032) |       |         | 1.07  | (0.040) | 1.09* | (0.041) | 1.08* | (0.041) | 1.08* | (0.041) |
| Standard of living in childhood |       |         |       |         |       |         |       |         |       |         |       |         |
| Poor (ref.)                     | 1     |         |       |         | 1     |         | 1     |         | 1     |         | 1     |         |
| Modest                          | 0.92* | (0.033) |       |         | 1.02  | (0.037) | 1.02  | (0.037) | 1.02  | (0.037) | 1.02  | (0.037) |
| Good                            | 0.87* | (0.037) |       |         | 0.96  | (0.047) | 0.94  | (0.047) | 0.95  | (0.048) | 0.94  | (0.048) |
| Occupational position           |       |         |       |         |       |         |       |         |       |         |       |         |
| Manual worker (ref.)            | 1     |         |       |         |       |         | 1     |         | 1     |         | 1     |         |
| Lower white collar              | 0.89* | (0.036) |       |         |       |         | 0.94  | (0.041) | 0.94  | (0.041) | 0.93  | (0.041) |
| Upper white collar              | 1.08* | (0.037) |       |         |       |         | 1.02  | (0.054) | 1.03  | (0.055) | 1.01  | (0.056) |
| Farmer/self-employed            | 1.55* | (0.044) |       |         |       |         | 1.54* | (0.046) | 1.45* | (0.047) | 1.48* | (0.048) |
| Other/unknown                   | 1.36* | (0.060) |       |         |       |         | 1.34* | (0.061) | 1.19* | (0.064) | 1.13* | (0.064) |
| Income                          |       |         |       |         |       |         |       |         |       |         |       |         |
| 1st quintile                    | 1.40* | (0.044) |       |         |       |         |       |         | 1.27* | (0.047) | 1.28* | (0.048) |
| 2nd quintile                    | 0.97  | (0.042) |       |         |       |         |       |         | 0.97  | (0.043) | 0.98  | (0.043) |
| 3rd quintile (ref.)             | 1     |         |       |         |       |         |       |         | 1     |         | 1     |         |
| 4th quintile                    | 0.92* | (0.041) |       |         |       |         |       |         | 0.94  | (0.042) | 0.94  | (0.042) |
| 5th quintile                    | 0.95  | (0.041) |       |         |       |         |       |         | 0.94  | (0.043) | 0.93  | (0.043) |
| Marital history                 |       |         |       |         |       |         |       |         |       |         |       |         |
| Never-married                   | 0.91  | (0.063) |       |         |       |         |       |         |       |         | 0.89  | (0.064) |
| Intact married (ref.)           | 1     |         |       |         |       |         |       |         |       |         | 1     |         |
| Divorced/widowed                | 1.03  | (0.034) |       |         |       |         |       |         |       |         | 1.04  | (0.035) |
| Remarried                       | 2.04* | (0.040) |       |         |       |         |       |         |       |         | 2.16* | (0.041) |

Model 0: explanatory variable + year of birth. Calculated separately for each explanatory variable

Model 1: level of education + control variables

Model 2: Model 1 + socioeconomic characteristics in early life

Model 3: Model 2 + occupational position

Model 4: Model 3 + income

Model 5: Model 4 + marital history

Method: logistic regression analysis. In all models year of birth is included as a continuous variable, but the coefficient is not shown

SE standard error

An asterisk indicates when the 95% confidence interval does not include 1

Education, Other Socioeconomic Characteristics Across the Life Course and Fertility Among Finnish Men

European Journal of Population

Jessica Nisén<sup>1,2</sup>, Pekka Martikainen<sup>1,2,3,4</sup>, Mikko Myrskylä<sup>1,2,5</sup>, Karri Silventoinen<sup>1,6</sup>

<sup>1</sup>Population Research Unit, Department of Social Research, University of Helsinki, P.O. Box 18 (Unioninkatu 35), 00014 Helsinki, Finland

<sup>2</sup>Max Planck Institute for Demographic Research, Konrad-Zuse-Straße 1, 18057 Rostock, Germany

<sup>3</sup>Centre for Health Equity Studies (CHESS), Stockholm University, Stockholm, Sweden

<sup>4</sup>Karolinska Institutet, Stockholm, Sweden

<sup>5</sup>Department of Social Policy, London School of Economics, London, UK

<sup>6</sup>School of Medicine, Osaka University, Suita, Japan

jessica.nisen@helsinki.fi; nisen@demogr.mpg.de
